# Supplementary material for: Real-world data of HER2-negative early breast cancer patients treated with anthracycline and/or taxane regimens in Japan
Source: Springer Nature journal article supplement (doi:10.1007/s12282-024-01572-8), 2024-04-29
Supplement: MOESM1 [file 27034764]

# Real-world data of HER2-negative early breast cancer patients treated with anthracycline and/or taxane regimens in Japan

## *Breast Cancer*

Akihiko Shimomura<sup>1</sup>, Yasuaki Sagara<sup>2</sup>, Ryo Koto<sup>3</sup>, Masakazu Fujiwara<sup>3</sup>, Yuka Kanemura<sup>3</sup>, Hiroshi Kitagawa<sup>3</sup>, Shigehira Saji<sup>4</sup>

<sup>1</sup>Department of Breast and Medical Oncology, National Center for Global Health and Medicine, Tokyo, Japan.

<sup>2</sup>Department of Breast and Thyroid Surgical Oncology, Social Medical Corporation Hakuai Sagara Hospital, Kagoshima, Japan.

<sup>3</sup>Medical Department, AstraZeneca K.K., Osaka, Japan.

<sup>4</sup>Department of Medical Oncology, Fukushima Medical University, Fukushima, Japan.

## Corresponding author

Professor Shigehira Saji, Department of Medical Oncology, Fukushima Medical University, 1 Hikarigaoka, Fukushima City, Fukushima, 960-1295, Japan.

E-mail: [ss-saji@wa2.so-net.ne.jp](mailto:ss-saji@wa2.so-net.ne.jp)

**Online Resource 1** List of ICD-10 codes for breast cancer diagnosis

| <b>Disease Name</b>                                                                                                                                                                                                                                                                                                                                                                                                                                                                                                                                                                                       | <b>ICD-10 code</b> |
|-----------------------------------------------------------------------------------------------------------------------------------------------------------------------------------------------------------------------------------------------------------------------------------------------------------------------------------------------------------------------------------------------------------------------------------------------------------------------------------------------------------------------------------------------------------------------------------------------------------|--------------------|
| Mammary Paget's disease, Nipple Breast Cancer, Areolar Breast Cancer                                                                                                                                                                                                                                                                                                                                                                                                                                                                                                                                      | C500               |
| Central Breast Cancer                                                                                                                                                                                                                                                                                                                                                                                                                                                                                                                                                                                     | C501               |
| Upper-inner Quadrant Breast Cancer                                                                                                                                                                                                                                                                                                                                                                                                                                                                                                                                                                        | C502               |
| Lower-inner Quadrant Breast Cancer                                                                                                                                                                                                                                                                                                                                                                                                                                                                                                                                                                        | C503               |
| Upper-outer Quadrant Breast Cancer                                                                                                                                                                                                                                                                                                                                                                                                                                                                                                                                                                        | C504               |
| Lower-outer Quadrant Breast Cancer                                                                                                                                                                                                                                                                                                                                                                                                                                                                                                                                                                        | C505               |
| Mammary Gland Axillary-tail Breast Cancer, Axillary Breast Cancer                                                                                                                                                                                                                                                                                                                                                                                                                                                                                                                                         | C506               |
| Overlapping Breast Cancer, Ectopic Breast Cancer                                                                                                                                                                                                                                                                                                                                                                                                                                                                                                                                                          | C508               |
| Postoperative Breast Cancer, Breast Cancer, Breast Cancer Recrudescence, Malignant Mammary Gland Tumor, Malignant Breast Tumor, Breast Sarcoma, Inflammatory Breast Cancer, Malignant Phyllodes Tumor, Advanced Breast Cancer, Breast Cancer - HER2 Overexpression, Breast Liposarcoma, Breast Angiosarcoma, Breast Fibrosarcoma, Invasive Ductal Carcinoma, Multiple Breast Cancer, Papillotubular Carcinoma, Mammary Gland Scirrhus Carcinoma, Mammary Gland Solid-tubular Carcinoma, HER2 Positive Breast Cancer, Breast Cancer Local Recurrence, Breast Cancer Postoperative Recurrence on Chest Wall | C509               |

*ICD-10* International Classification of Diseases, 10<sup>th</sup> revision.

**Online Resource 2** List of surgery receipt codes for primary breast cancer

| <b>Name of classification</b>    | <b>Medical act</b>                                                       | <b>Receipt code</b> |
|----------------------------------|--------------------------------------------------------------------------|---------------------|
| Partial mastectomy               | Partial mastectomy                                                       | 150274610           |
| Mastectomy                       | Mastectomy                                                               | 150121410           |
|                                  | Mastectomy (Hereditary Breast and Ovarian Cancer patients)               | 150413710           |
| Destruction of breast lesion     | Destruction of breast lesion                                             | 150121550           |
| Mammary gland malignancy surgery | Simple mastectomy (total mastectomy)                                     | 150121610           |
|                                  | Simple bilateral mastectomy with lymph node radical excision             | 150121710           |
|                                  | Lumpectomy with axillary dissection                                      | 150121810           |
|                                  | Extended radical bilateral mastectomy                                    | 150121910           |
|                                  | Partial mastectomy (with axillary lymph node radical excision)           | 150262710           |
|                                  | Partial mastectomy (without axillary lymph node radical excision)        | 150303110           |
|                                  | Mastectomy (without axillary dissection)                                 | 150316510           |
|                                  | Nipple-sparing mastectomy (without axillary dissection)                  | 150386410           |
|                                  | Nipple-sparing mastectomy (with axillary dissection)                     | 150386510           |
|                                  | Mammary gland malignancy surgery and both sides of lymph node dissection | 150122150           |

**Online Resource 3** List of drug therapy receipt codes

| Type                | Generic name                                                                                                                                                                                                                                                                                                                                                                         | Receipt code                                                                                                                                                                                                                                                                                                                                                                                    |
|---------------------|--------------------------------------------------------------------------------------------------------------------------------------------------------------------------------------------------------------------------------------------------------------------------------------------------------------------------------------------------------------------------------------|-------------------------------------------------------------------------------------------------------------------------------------------------------------------------------------------------------------------------------------------------------------------------------------------------------------------------------------------------------------------------------------------------|
| Antineoplastic drug | Trastuzumab                                                                                                                                                                                                                                                                                                                                                                          | 640451013, 620001938, 622069901, 622069801                                                                                                                                                                                                                                                                                                                                                      |
|                     | Pertuzumab                                                                                                                                                                                                                                                                                                                                                                           | 622255101                                                                                                                                                                                                                                                                                                                                                                                       |
|                     | Trastuzumab emtansine                                                                                                                                                                                                                                                                                                                                                                | 622264501, 622628901, 622659701, 622629001, 622659801, 622264401, 622630801, 622679301, 622630701, 622679201                                                                                                                                                                                                                                                                                    |
|                     | Trastuzumab deruxtecan                                                                                                                                                                                                                                                                                                                                                               | 629907101                                                                                                                                                                                                                                                                                                                                                                                       |
|                     | Lapatinib                                                                                                                                                                                                                                                                                                                                                                            | 621911601                                                                                                                                                                                                                                                                                                                                                                                       |
|                     | Doxorubicin                                                                                                                                                                                                                                                                                                                                                                          | 620004851, 620003675, 622014001, 646180002, 621983201, 621983301, 621995301, 621995401                                                                                                                                                                                                                                                                                                          |
|                     | Epirubicin                                                                                                                                                                                                                                                                                                                                                                           | 620003790, 620003791, 620003792, 620003793, 620002978, 620002979, 640433066, 646180019, 620007224, 620007225, 620008174, 620008175, 620009523, 620009526, 621966401, 621966601, 622760200, 622760300, 622760400, 620002905, 620002906, 620006694, 620006695, 620009524, 620009525, 620009527, 621966501, 621966701, 622246601, 622246701                                                        |
|                     | Paclitaxel                                                                                                                                                                                                                                                                                                                                                                           | 620003751, 620003752, 640412113, 640432023, 620004170, 620004171, 620005688, 620005689, 620005690, 622082001, 622082101, 622259101, 622259201, 622375001, 622375101, 622760500, 622760600, 622760700, 622009101, 622009201, 622009102, 622009202                                                                                                                                                |
|                     | Docetaxel                                                                                                                                                                                                                                                                                                                                                                            | 620919801, 620919901, 640411025, 640411026, 622068501, 622068601, 622215301, 622215401, 622272001, 622272101, 622285201, 622285301, 622285401, 622294901, 622295001, 622295501, 622295601, 622354801, 622354901, 622356401, 622356501, 622408501, 622408601, 622429301, 622429401, 622435002, 622435102, 622231801, 622231901, 622417601, 622417701, 622290401, 622290501, 622283101, 622283201 |
|                     | Nab-paclitaxel                                                                                                                                                                                                                                                                                                                                                                       | 621970101                                                                                                                                                                                                                                                                                                                                                                                       |
|                     | Atezolizumab                                                                                                                                                                                                                                                                                                                                                                         | 622594601, 629900601                                                                                                                                                                                                                                                                                                                                                                            |
|                     | Bevacizumab                                                                                                                                                                                                                                                                                                                                                                          | 620004872, 620004873, 629904901, 629905001, 629905901, 629906001                                                                                                                                                                                                                                                                                                                                |
|                     | Pembrolizumab                                                                                                                                                                                                                                                                                                                                                                        | 622515801, 622515701                                                                                                                                                                                                                                                                                                                                                                            |
|                     | Eribulin                                                                                                                                                                                                                                                                                                                                                                             | 622085201                                                                                                                                                                                                                                                                                                                                                                                       |
|                     | Vinorelbine                                                                                                                                                                                                                                                                                                                                                                          | 621954401, 621954501, 640432004, 640432005                                                                                                                                                                                                                                                                                                                                                      |
| Gemcitabine         | 640454012, 640454013, 640432018, 640432019, 621970201, 621970202, 621970301, 621970302, 621973401, 621973501, 622019601, 622019701, 622028601, 622028701, 622062103, 622062105, 622062203, 622062205, 622098901, 622099001, 622202401, 622202501, 622393001, 622393101, 622460401, 622460501, 622487701, 622487801, 621994401, 621994501, 622062101, 622062201, 622272801, 622272901 |                                                                                                                                                                                                                                                                                                                                                                                                 |
| Capecitabine        | 610470009, 622656401, 622674301, 622677701, 622679001, 622695801, 622700101                                                                                                                                                                                                                                                                                                          |                                                                                                                                                                                                                                                                                                                                                                                                 |
| Olaparib            | 622606901, 622607001                                                                                                                                                                                                                                                                                                                                                                 |                                                                                                                                                                                                                                                                                                                                                                                                 |

|                   |                                              |                                                                                                                                                                                                                                                                                                                                                                                                                                                        |
|-------------------|----------------------------------------------|--------------------------------------------------------------------------------------------------------------------------------------------------------------------------------------------------------------------------------------------------------------------------------------------------------------------------------------------------------------------------------------------------------------------------------------------------------|
|                   | Carboplatin                                  | 620004732, 620004733, 620004734, 644210074, 644210075, 644210076, 644210077, 620000216, 620000217, 620002932, 620004117, 620004118, 620004119, 620004120, 620004121, 620004122, 620007254, 620007255, 620007256, 621754502, 621754602, 621754702, 622098103, 622098203, 622098303, 622761100, 622761200, 622761300, 622882601, 622882701, 622882801, 620002929, 620002930, 620002931, 620004114, 620004115, 620004116, 622098101, 622098201, 622098301 |
|                   | Everolimus                                   | 621980901, 622216801, 622226301, 622226401                                                                                                                                                                                                                                                                                                                                                                                                             |
|                   | Irinotecan                                   | 620007257, 620007258, 644290006, 644290007, 620919501, 620919701, 644290008, 644290009, 622808601, 620009515, 620009516, 620009519, 620009520, 621900302, 621900402, 622019401, 622019501, 622059701, 622059801, 622230201, 622230301, 622236901, 622237001, 622258901, 622259001, 622470401, 622470501, 620009517, 620009521, 622091101, 622091201, 620009518, 620009522                                                                              |
|                   | Tegafur, gimeracil, and oteracil combination | 622254901, 622255001, 622434701, 622434801, 622487301, 622487401, 622275701, 622275801, 622256001, 622256101, 622430801, 622430901, 622497901, 622498001, 622397101, 622397201, 622397301, 622397401, 622537501, 622537601, 620009353, 620009354, 620915501, 620915601, 622243001, 622243101, 610421353, 610421354, 622294601, 622294701                                                                                                               |
|                   | Abemaciclib                                  | 622653801, 622653901, 622654001                                                                                                                                                                                                                                                                                                                                                                                                                        |
| Endocrine therapy | Fulvestrant                                  | 622101401                                                                                                                                                                                                                                                                                                                                                                                                                                              |
|                   | Goserelin                                    | 640443027, 640462004, 642490105                                                                                                                                                                                                                                                                                                                                                                                                                        |
|                   | Leuprorelin                                  | 620555101, 620555201, 620555301, 620555401, 621495301, 622444901, 640406224, 640432015, 640432016, 640462036, 642490119, 622266501, 622266601, 622298301, 622298401                                                                                                                                                                                                                                                                                    |
|                   | Tamoxifen                                    | 620003593, 620003594, 614210059, 614210149, 620001885, 620920504, 620921005, 620921501, 620921701, 620921905, 622041701, 622053001, 622075101, 622317900, 622671201, 622671301, 614210152, 620921003, 620921903                                                                                                                                                                                                                                        |
|                   | Anastrozole                                  | 620003507, 610443065, 622180501, 622195001, 622195501, 622198501, 622204401, 622208401, 622208701, 622211201, 622213401, 622215501, 622218301, 622238501, 622671101, 622689100, 622213701, 622222601, 622309400                                                                                                                                                                                                                                        |
|                   | Exemestane                                   | 610462026, 622115801, 622118801, 622158301                                                                                                                                                                                                                                                                                                                                                                                                             |
|                   | Letrozole                                    | 620003467, 622411401, 622412801, 622413201, 622417401, 622418401, 622418402, 622420001, 622422101, 622427401, 622427901, 622429201, 622429901, 622431001, 622432001, 622433901, 622435201, 622436701, 622438901, 622475600                                                                                                                                                                                                                             |
|                   | Toremifene                                   | 610407022, 610407023, 620004006, 622169001, 622742600, 622742700                                                                                                                                                                                                                                                                                                                                                                                       |
|                   | Medroxyprogesterone                          | 612470030, 620008693, 612470052, 620537901, 612470038, 612470053, 620537802, 620538201, 620538401, 621285301, 622736700, 620538001                                                                                                                                                                                                                                                                                                                     |

**Online Resource 4** Proportion of patients for each pre- and postoperative therapy treatment pattern

|                                          |                        | Luminal ( <i>n</i> = 41,733) |                                |                               |                               |                                 | Triple-negative ( <i>n</i> = 37,044) |                               |                               |                             |                                  |
|------------------------------------------|------------------------|------------------------------|--------------------------------|-------------------------------|-------------------------------|---------------------------------|--------------------------------------|-------------------------------|-------------------------------|-----------------------------|----------------------------------|
|                                          |                        | Preoperative only            | Postoperative only             | Pre+postoperative             |                               | No pre+postoperative            | Preoperative only                    | Postoperative only            | Pre+postoperative             |                             | No pre+postoperative             |
|                                          |                        |                              |                                | Preoperative                  | Postoperative                 |                                 |                                      |                               | Preoperative                  | Postoperative               |                                  |
|                                          |                        |                              |                                |                               |                               |                                 |                                      |                               |                               |                             |                                  |
| Total                                    | <i>n</i> , %           | 400 (100.0)                  | 32,300 (100.0)                 | 8,021 (100.0)                 | 8,021 (100.0)                 | 1,012 (100.0)                   | 2,463 (100.0)                        | 6,049 (100.0)                 | 1,254 (100.0)                 | 1,254 (100.0)               | 27,278 (100.0)                   |
| Regimens containing A and/or T           | <i>n</i> , %<br>95% CI | 119 (29.8)<br>[24.60–35.48]  | 8,567 (26.5)<br>[25.94–27.12]  | 4,522 (56.4)<br>[55.05–57.70] | 994 (12.4)<br>[11.54–13.30]   | ---                             | 2,386 (96.9)<br>[95.99–97.57]        | 5,321 (88.0)<br>[87.00–88.87] | 1,141 (91.0)<br>[89.01–92.64] | 422 (33.7)<br>[30.73–36.70] | ---                              |
| Regimens not containing A and/or T       | <i>n</i> , %<br>95% CI | 4 (1.0)<br>[0.32–3.06]       | 657 (2.0)<br>[1.85–2.23]       | 175 (2.2)<br>[1.82–2.61]      | 831 (10.4)<br>[9.57–11.20]    | ---                             | 77 (3.1)<br>[2.43–4.01]              | 728 (12.0)<br>[11.13–13.00]   | 113 (9.0)<br>[7.36–10.99]     | 832 (66.3)<br>[63.30–69.27] | ---                              |
| Endocrine therapy only                   | <i>n</i> , %<br>95% CI | 277 (69.3)<br>[63.49–74.47]  | 23,076 (71.4)<br>[70.84–72.04] | 3,324 (41.4)<br>[40.13–42.76] | 6,196 (77.2)<br>[76.11–78.35] | ---                             | ---                                  | ---                           | ---                           | ---                         | ---                              |
| No chemotherapy and no endocrine therapy | <i>n</i> , %<br>95% CI | ---                          | ---                            | ---                           | ---                           | 1,012 (100.0)<br>[99.62–100.00] | ---                                  | ---                           | ---                           | ---                         | 27,278 (100.0)<br>[99.99–100.00] |

A anthracycline, CI confidence interval, T taxane

**Online Resource 5** Patient characteristics in the luminal-type group

|                        |        | Luminal-type  |                                |               |              |                         |                         |                                    |                        |                                          |            |
|------------------------|--------|---------------|--------------------------------|---------------|--------------|-------------------------|-------------------------|------------------------------------|------------------------|------------------------------------------|------------|
|                        |        | Overall       | Regimens containing A and/or T |               |              |                         |                         | Regimens not containing A and/or T | Endocrine therapy only | No chemotherapy and no endocrine therapy |            |
|                        |        |               | All                            | A only        | T only       | A+T concurrent regimens | A+T sequential regimens |                                    |                        |                                          |            |
| Number of patients (N) |        | 42,636        | 32,133                         | 12,773        | 1,510        | 3,670                   | 162                     | 7,431                              | 753                    | 18,200                                   | 407        |
| Age, years             | Median | 64            | 63                             | 54            | 58           | 57                      | 53                      | 53                                 | 68                     | 69                                       | 66         |
|                        | Min    | 19            | 19                             | 19            | 28           | 19                      | 31                      | 21                                 | 28                     | 23                                       | 26         |
|                        | Max    | 100           | 100                            | 87            | 86           | 87                      | 81                      | 86                                 | 94                     | 100                                      | 97         |
|                        | <40    | 2,029 (4.8)   | 1,409 (4.4)                    | 968 (7.6)     | 83 (5.5)     | 191 (5.2)               | 12 (7.4)                | 682 (9.2)                          | 12 (1.6)               | 401 (2.2)                                | 28 (6.9)   |
|                        | 40–49  | 8,078 (18.9)  | 6,469 (20.1)                   | 3,733 (29.2)  | 377 (25.0)   | 984 (26.8)              | 54 (33.3)               | 2,318 (31.2)                       | 94 (12.5)              | 2,556 (14.0)                             | 86 (21.1)  |
|                        | 50–59  | 7,546 (17.7)  | 5,672 (17.7)                   | 3,195 (25.0)  | 356 (23.6)   | 848 (23.1)              | 40 (24.7)               | 1,951 (26.3)                       | 107 (14.2)             | 2,322 (12.8)                             | 48 (11.8)  |
|                        | 60–69  | 10,095 (23.7) | 7,680 (23.9)                   | 3,417 (26.8)  | 462 (30.6)   | 1,068 (29.1)            | 40 (24.7)               | 1,847 (24.9)                       | 202 (26.8)             | 3,986 (21.9)                             | 75 (18.4)  |
|                        | ≥70    | 14,888 (34.9) | 10,903 (33.9)                  | 1,460 (11.4)  | 232 (15.4)   | 579 (15.8)              | 16 (9.9)                | 633 (8.5)                          | 338 (44.9)             | 8,935 (49.1)                             | 170 (41.8) |
| Sex                    | Male   | 307 (0.7)     | 287 (0.9)                      | 60 (0.5)      | 14 (0.9)     | 18 (0.5)                | 1 (0.6)                 | 27 (0.4)                           | 9 (1.2)                | 213 (1.2)                                | 5 (1.2)    |
|                        | Female | 42,329 (99.3) | 31,846 (99.1)                  | 12,713 (99.5) | 1,496 (99.1) | 3,652 (99.5)            | 161 (99.4)              | 7,404 (99.6)                       | 744 (98.8)             | 17,987 (98.8)                            | 402 (98.8) |
| T factor               | 0      | 38 (0.1)      | 24 (0.1)                       | 17 (0.1)      | 2 (0.1)      | 3 (0.1)                 | 0                       | 12 (0.2)                           | 1 (0.1)                | 6 (0.0)                                  | 0          |
|                        | 1      | 4,967 (11.6)  | 4,051 (12.6)                   | 1,923 (15.1)  | 245 (16.2)   | 551 (15.0)              | 21 (13.0)               | 1,106 (14.9)                       | 100 (13.3)             | 1,981 (10.9)                             | 47 (11.5)  |
|                        | 2      | 30,999 (72.7) | 23,266 (72.4)                  | 8,379 (65.6)  | 985 (65.2)   | 2,627 (71.6)            | 107 (66.0)              | 4,660 (62.7)                       | 494 (65.6)             | 14,095 (77.4)                            | 298 (73.2) |
|                        | 3      | 2,868 (6.7)   | 1,972 (6.1)                    | 1,059 (8.3)   | 115 (7.6)    | 193 (5.3)               | 14 (8.6)                | 737 (9.9)                          | 65 (8.6)               | 819 (4.5)                                | 29 (7.1)   |
|                        | 4      | 3,764 (8.8)   | 2,820 (8.8)                    | 1,395 (10.9)  | 163 (10.8)   | 296 (8.1)               | 20 (12.3)               | 916 (12.3)                         | 93 (12.4)              | 1,299 (7.1)                              | 33 (8.1)   |
| N factor               | 0      | 23,674 (55.5) | 17,866 (55.6)                  | 4,439 (34.8)  | 575 (38.1)   | 1,915 (52.2)            | 54 (33.3)               | 1,895 (25.5)                       | 372 (49.4)             | 12,821 (70.4)                            | 234 (57.5) |

|                 |         |                   |                   |                   |                  |                  |                |                  |                |                   |                |
|-----------------|---------|-------------------|-------------------|-------------------|------------------|------------------|----------------|------------------|----------------|-------------------|----------------|
|                 | 1       | 15,368 (36.0)     | 11,823 (36.8)     | 6,521 (51.1)      | 747 (49.5)       | 1,483 (40.4)     | 85 (52.5)      | 4,206 (56.6)     | 318 (42.2)     | 4,842 (26.6)      | 142 (34.9)     |
|                 | 2       | 2,141 (5.0)       | 1,520 (4.7)       | 1,041 (8.2)       | 125 (8.3)        | 164 (4.5)        | 13 (8.0)       | 739 (9.9)        | 41 (5.4)       | 413 (2.3)         | 25 (6.1)       |
|                 | 3       | 1,453 (3.4)       | 924 (2.9)         | 772 (6.0)         | 63 (4.2)         | 108 (2.9)        | 10 (6.2)       | 591 (8.0)        | 22 (2.9)       | 124 (0.7)         | 6 (1.5)        |
| M factor        | 0       | 42,636<br>(100.0) | 32,133<br>(100.0) | 12,773<br>(100.0) | 1,510<br>(100.0) | 3,670<br>(100.0) | 162<br>(100.0) | 7,431<br>(100.0) | 753<br>(100.0) | 18,200<br>(100.0) | 407<br>(100.0) |
|                 | 1       | 0                 | 0                 | 0                 | 0                | 0                | 0              | 0                | 0              | 0                 | 0              |
| Clinical stage  | I       | 0                 | 0                 | 0                 | 0                | 0                | 0              | 0                | 0              | 0                 | 0              |
|                 | II      | 35,042<br>(82.2)  | 26,679<br>(83.0)  | 9,467<br>(74.1)   | 1,156<br>(76.6)  | 3,104<br>(84.6)  | 118<br>(72.8)  | 5,089<br>(68.5)  | 588<br>(78.1)  | 16,286<br>(89.5)  | 338<br>(83.0)  |
|                 | III     | 7,594 (17.8)      | 5,454 (17.0)      | 3,306 (25.9)      | 354 (23.4)       | 566 (15.4)       | 44 (27.2)      | 2,342 (31.5)     | 165 (21.9)     | 1,914 (10.5)      | 69 (17.0)      |
| Hospital        | <200    | 1,371 (3.2)       | 1,024 (3.2)       | 322 (2.5)         | 66 (4.4)         | 77 (2.1)         | 3 (1.9)        | 176 (2.4)        | 37 (4.9)       | 655 (3.6)         | 10 (2.5)       |
| capacity, beds  | 200–499 | 22,550 (52.9)     | 17,031 (53.0)     | 6,585 (51.6)      | 872 (57.7)       | 1,930 (52.6)     | 92 (56.8)      | 3,691 (49.7)     | 401 (53.3)     | 9,795 (53.8)      | 250 (61.4)     |
|                 | ≥500    | 18,715 (43.9)     | 14,078 (43.8)     | 5,866 (45.9)      | 572 (37.9)       | 1,663 (45.3)     | 67 (41.4)      | 3,564 (48.0)     | 315 (41.8)     | 7,750 (42.6)      | 147 (36.1)     |
| Cancer          | Yes     | 34,241<br>(80.3)  | 25,747<br>(80.1)  | 10,729<br>(84.0)  | 1,176<br>(77.9)  | 3,130<br>(85.3)  | 120<br>(74.1)  | 6,303<br>(84.8)  | 554<br>(73.6)  | 14,165<br>(77.8)  | 299<br>(73.5)  |
| therapeutic     | No      | 8,395 (19.7)      | 6,386 (19.9)      | 2,044 (16.0)      | 334 (22.1)       | 540 (14.7)       | 42 (25.9)      | 1,128 (15.2)     | 199 (26.4)     | 4,035 (22.2)      | 108 (26.5)     |
| facility status | No      | 8,395 (19.7)      | 6,386 (19.9)      | 2,044 (16.0)      | 334 (22.1)       | 540 (14.7)       | 42 (25.9)      | 1,128 (15.2)     | 199 (26.4)     | 4,035 (22.2)      | 108 (26.5)     |
| Follow-up       | Median  | 157.43            | 168.29            | 181.43            | 206.00           | 192.00           | 209.29         | 169.86           | 165.00         | 159.29            | 189.86         |
| period, weeks   | Min     | 4.3               | 4.3               | 4.3               | 6.7              | 6.3              | 9.4            | 4.3              | 5.9            | 4.3               | 28.0           |
|                 | Max     | 659.4             | 659.4             | 659.4             | 659.4            | 584.9            | 646.7          | 653.1            | 647.4          | 622.1             | 576.6          |

Data are *n* (%) unless otherwise stated.

*A* anthracycline, *M* factor metastasis, *Max* maximum, *Min* minimum, *N* factor lymph node, *T* taxane, *T* factor tumor size



**Online Resource 6** Patient characteristics in the triple-negative group

|                                 |        | Triple-negative |                                |             |              |                         |                         |                                    |                                          |
|---------------------------------|--------|-----------------|--------------------------------|-------------|--------------|-------------------------|-------------------------|------------------------------------|------------------------------------------|
|                                 |        | Overall         | Regimens containing A and/or T |             |              |                         |                         | Regimens not containing A and/or T | No chemotherapy and no endocrine therapy |
|                                 |        |                 | All                            | A only      | T only       | A+T concurrent regimens | A+T sequential regimens |                                    |                                          |
| Number of patients ( <i>N</i> ) |        | 10,503          | 5,594                          | 787         | 1,046        | 70                      | 3,691                   | 393                                | 4,516                                    |
| Age, years                      | Median | 65              | 59                             | 63          | 63           | 56                      | 57                      | 76                                 | 74                                       |
|                                 | Min    | 23              | 23                             | 28          | 26           | 32                      | 23                      | 31                                 | 24                                       |
|                                 | Max    | 100             | 95                             | 95          | 87           | 85                      | 85                      | 92                                 | 100                                      |
|                                 | <40    | 620 (5.9)       | 453 (8.1)                      | 47 (6.0)    | 59 (5.6)     | 8 (11.4)                | 339 (9.2)               | 6 (1.5)                            | 161 (3.6)                                |
|                                 | 40–49  | 1,609 (15.3)    | 1,092 (19.5)                   | 122 (15.5)  | 166 (15.9)   | 16 (22.9)               | 788 (21.3)              | 11 (2.8)                           | 506 (11.2)                               |
|                                 | 50–59  | 1,874 (17.8)    | 1,343 (24.0)                   | 153 (19.4)  | 200 (19.1)   | 19 (27.1)               | 971 (26.3)              | 19 (4.8)                           | 512 (11.3)                               |
|                                 | 60–69  | 2,415 (23.0)    | 1,644 (29.4)                   | 254 (32.3)  | 293 (28.0)   | 20 (28.6)               | 1,077 (29.2)            | 74 (18.8)                          | 697 (15.4)                               |
|                                 | ≥70    | 3,985 (37.9)    | 1,062 (19.0)                   | 211 (26.8)  | 328 (31.4)   | 7 (10.0)                | 516 (14.0)              | 283 (72.0)                         | 2,640 (58.5)                             |
| Sex                             | Male   | 20 (0.2)        | 3 (0.1)                        | 0           | 1 (0.1)      | 0                       | 2 (0.1)                 | 1 (0.3)                            | 16 (0.4)                                 |
|                                 | Female | 10,483 (99.8)   | 5,591 (99.9)                   | 787 (100.0) | 1,045 (99.9) | 70 (100.0)              | 3,689 (99.9)            | 392 (99.7)                         | 4,500 (99.6)                             |
| T factor                        | 0      | 14 (0.1)        | 13 (0.2)                       | 3 (0.4)     | 2 (0.2)      | 0                       | 8 (0.2)                 | 1 (0.3)                            | 0                                        |
|                                 | 1      | 916 (8.7)       | 595 (10.6)                     | 85 (10.8)   | 87 (8.3)     | 5 (7.1)                 | 418 (11.3)              | 31 (7.9)                           | 290 (6.4)                                |
|                                 | 2      | 7,733 (73.6)    | 4,014 (71.8)                   | 558 (70.9)  | 756 (72.3)   | 43 (61.4)               | 2,657 (72.0)            | 279 (71.0)                         | 3,440 (76.2)                             |
|                                 | 3      | 896 (8.5)       | 479 (8.6)                      | 71 (9.0)    | 87 (8.3)     | 11 (15.7)               | 310 (8.4)               | 26 (6.6)                           | 391 (8.7)                                |
|                                 | 4      | 944 (9.0)       | 493 (8.8)                      | 70 (8.9)    | 114 (10.9)   | 11 (15.7)               | 298 (8.1)               | 56 (14.2)                          | 395 (8.7)                                |
| N factor                        | 0      | 5,808 (55.3)    | 2,523 (45.1)                   | 394 (50.1)  | 534 (51.1)   | 28 (40.0)               | 1,567 (42.5)            | 200 (50.9)                         | 3,085 (68.3)                             |
|                                 | 1      | 3,545 (33.8)    | 2,228 (39.8)                   | 294 (37.4)  | 359 (34.3)   | 31 (44.3)               | 1,544 (41.8)            | 149 (37.9)                         | 1,168 (25.9)                             |
|                                 | 2      | 621 (5.9)       | 440 (7.9)                      | 54 (6.9)    | 76 (7.3)     | 8 (11.4)                | 302 (8.2)               | 23 (5.9)                           | 158 (3.5)                                |
|                                 | 3      | 529 (5.0)       | 403 (7.2)                      | 45 (5.7)    | 77 (7.4)     | 3 (4.3)                 | 278 (7.5)               | 21 (5.3)                           | 105 (2.3)                                |

|                 |         |                |               |                |                  |               |                  |                |                  |
|-----------------|---------|----------------|---------------|----------------|------------------|---------------|------------------|----------------|------------------|
| M factor        | 0       | 10,503 (100.0) | 5,594 (100.0) | 787<br>(100.0) | 1,046<br>(100.0) | 70<br>(100.0) | 3,691<br>(100.0) | 393<br>(100.0) | 4,516<br>(100.0) |
|                 | 1       | 0              | 0             | 0              | 0                | 0             | 0                | 0              | 0                |
| Clinical stage  | I       | 0              | 0             | 0              | 0                | 0             | 0                | 0              | 0                |
|                 | II      | 8,363 (79.6)   | 4,256 (76.1)  | 618 (78.5)     | 795 (76.0)       | 44 (62.9)     | 2,799 (75.8)     | 298 (75.8)     | 3,809 (84.3)     |
|                 | III     | 2,140 (20.4)   | 1,338 (23.9)  | 169 (21.5)     | 251 (24.0)       | 26 (37.1)     | 892 (24.2)       | 95 (24.2)      | 707 (15.7)       |
| Hospital        | <200    | 347 (3.3)      | 111 (2.0)     | 26 (3.3)       | 18 (1.7)         | 2 (2.9)       | 65 (1.8)         | 21 (5.3)       | 215 (4.8)        |
| capacity, beds  | 200–499 | 5,519 (52.5)   | 2,833 (50.6)  | 444 (56.4)     | 556 (53.2)       | 35 (50.0)     | 1,798 (48.7)     | 219 (55.7)     | 2,467 (54.6)     |
|                 | ≥500    | 4,637 (44.1)   | 2,650 (47.4)  | 317 (40.3)     | 472 (45.1)       | 33 (47.1)     | 1,828 (49.5)     | 153 (38.9)     | 1,834 (40.6)     |
| Cancer          | Yes     | 8,494 (80.9)   | 4,676 (83.6)  | 609 (77.4)     | 867 (82.9)       | 57 (81.4)     | 3,143 (85.2)     | 295 (75.1)     | 3,523 (78.0)     |
| therapeutic     | No      | 2,009 (19.1)   | 918 (16.4)    | 178 (22.6)     | 179 (17.1)       | 13 (18.6)     | 548 (14.8)       | 98 (24.9)      | 993 (22.0)       |
| facility status |         |                |               |                |                  |               |                  |                |                  |
| Follow-up       | Median  | 120.00         | 138.29        | 153.71         | 147.07           | 170.79        | 133.29           | 123.14         | 104.36           |
| period, weeks   | Min     | 4.3            | 4.4           | 5.0            | 4.4              | 21.9          | 4.4              | 4.3            | 4.3              |
|                 | Max     | 617.9          | 617.9         | 613.7          | 586.9            | 477.1         | 617.9            | 565.3          | 581.3            |

Data are *n* (%) unless otherwise stated.

*A* anthracycline, *M* factor metastasis, *Max* maximum, *Min* minimum, *N* factor lymph node, *T* taxane, *T* factor tumor size
